# Supplementary material for: Development and feasibility of a wearable infant wrist band for the objective measurement of physical activity using accelerometery
Source: PubMed Central journal article supplement (PMC5831201; doi:10.1186/s40814-018-0256-x), 2018-03-01
Supplement: 40814_2018_256_MOESM1_ESM.pdf [file 40814_2018_256_MOESM1_ESM.pdf]

1  
2  
3  
4  
5  
6  
7  
8  
9  
10  
11  
12  
13  
14  
15  
16  
17  
18  
19  
20  
21  
22  
23  
24  
25  
26  
27  
28

**Appendix 1: Feasibility Questionnaire**

1. How **comfortable** do you think the band was for your baby? (Tick the box that applies)

|                  |             |                            |                            |                    |
|------------------|-------------|----------------------------|----------------------------|--------------------|
| Very comfortable | Comfortable | It was fine/<br>don't know | A little bit uncomfortable | Very uncomfortable |
|                  |             |                            |                            |                    |

2. Were you happy with the **safety** of the device and the band? (Tick the box that applies)

|                  |                    |                            |                            |                                               |
|------------------|--------------------|----------------------------|----------------------------|-----------------------------------------------|
| I was very happy | I was mostly happy | It was fine/<br>don't know | I was a little bit worried | I was very worried and would not use it again |
|                  |                    |                            |                            |                                               |

3. If you had to choose any **colour** for the band what would your preference be? (Tick all those that apply)

- Black
- Blue
- Red
- Green
- White
- Pink
- Other \_\_\_\_\_(describe)
- I don't really mind

4. Is there any **colour** you do not like for the band? (Tick all those that apply)

- Black
  - Blue
  - Red
  - Green
  - White
  - Pink
  - Other \_\_\_\_\_(describe)
  - I don't really mind
-

1  
2  
3  
4  
5  
6  
7  
8  
9  
10  
11  
12  
13  
14  
15  
16  
17  
18  
19  
20  
21  
22  
23  
24  
25  
26  
27  
28  
29  
30  
31  
32  
33

5. How did you find the closing buttons of the band? (Tick all those that apply)

- It was easy to close
- It was not easy to close
- The band provided secure and safe attachment of the device
- I was worried my baby would be able to unbutton it
- I don't really mind
- Other \_\_\_\_\_(explain)

6. How did you find the fabric material of the band? (Tick all those that apply)

- It was comfortable
- It was uncomfortable
- The band dried quickly when it had become wet
- The band took long to dry when it had become wet
- The band started smelling after a few days
- Other \_\_\_\_\_(explain)

7. How quickly did the band dry if it got wet? (Tick the box that applies)

---

| Very quickly | Quickly | Neither quick<br>nor slowly | Slowly | Very slowly |
|--------------|---------|-----------------------------|--------|-------------|
|              |         |                             |        |             |

8. Did you feel that the band attracted too much attention from other people? (If yes, please comment)

- Yes \_\_\_\_\_(Comment)
- No

9. How did your baby react to the band? (Tick all those that apply)

- My baby did not behave any differently
  - My baby was curious about the device
  - My baby ignored the device
  - My baby wanted to take the device off
  - My baby got used to the device quickly
  - My baby took a long time to get used to the device
  - No reaction
  - Other \_\_\_\_\_(explain)
-
